# Supplementary material for: Heteropolytopic phosphanylarylthiolato ligands: formation of cis isomers of nickel(ii), palladium(ii) and platinum(ii) complexes with 1-P(Biph)-2-SHC6H4 (Biph = 1,1′-biphenyl-2,2′-diyl)
Source: Royal Society of Chemistry journal article supplement (doi:10.1039/c2dt00006g), 2012-01-01
Supplement: c2dt00006g.pdf [file c2dt00006g.pdf]

## Supporting Material - Revised

### **Heteropolytopic phosphanylarylthiolato ligands: Formation of *cis* isomers of nickel(II), palladium(II) and platinum(II) complexes with 1-P(Biph)-2-SHC<sub>6</sub>H<sub>4</sub> (Biph = 1,1'-biphenyl-2,2'-diyl)**

*Alexandra Hildebrand,<sup>a,b</sup> Imola Sárosi,<sup>a,b</sup> Peter Lönnecke,<sup>b</sup> Luminița Silaghi-Dumitrescu,<sup>a\*</sup> Menyhárt B. Sárosi<sup>a,b</sup> Ioan Silaghi-Dumitrescu<sup>a,\*</sup> and Evamarie Hey-Hawkins<sup>b\*</sup>*

<sup>a</sup> Department of Chemistry, Babeş-Bolyai University, Kogalniceanu 1, RO-400084 Cluj-Napoca, Romania. E-mail: [lusi@chem.ubbcluj.ro](mailto:lusi@chem.ubbcluj.ro)

<sup>b</sup> Universität Leipzig, Institut für Anorganische Chemie, Johannisallee 29, D-04103 Leipzig, Germany. E-mail: [hey@uni-leipzig.de](mailto:hey@uni-leipzig.de)

\* deceased in December 2009 – he will be missed

**Table 1S.** Total and relative calculated energies for phosphanylarylthiolato complexes **1-3**, of their isomers not observed experimentally and of the tetrahedral triplet structures.

|                                                                           | symm.           | Imag. freq. | $\langle S^2 \rangle$ | Total E (a.u.) | Rel. E (kJ mol <sup>-1</sup> ) | Rel. E (kJ mol <sup>-1</sup> ) |
|---------------------------------------------------------------------------|-----------------|-------------|-----------------------|----------------|--------------------------------|--------------------------------|
| <i>trans</i> -[Ni{(BiphPS)-κ <sup>2</sup> S,P} <sub>2</sub> ]             | C <sub>2</sub>  | none        | 0                     | -3033.657306   | 0.0                            | 0.0                            |
| <i>cis</i> -[Ni{(BiphPS)-κ <sup>2</sup> S,P} <sub>2</sub> ] ( <b>1</b> )  | C <sub>2h</sub> | 16i         | 0                     | -3033.648820   | 5.3                            | 22.3                           |
| [Ni{(BiphPS)-κ <sup>2</sup> S,P} <sub>2</sub> ] tetrahedral               | C <sub>2</sub>  | none        | 2.02                  | -3033.620864   | 22.9                           | 95.7                           |
| <i>trans</i> -[Pd{((BiphPS)-κ <sup>2</sup> S,P) <sub>2</sub> }]           | C <sub>2</sub>  | none        | 0                     | -2991.085080   | 0.0                            | 0.0                            |
| <i>cis</i> -[Pd{((BiphPS)-κ <sup>2</sup> S,P) <sub>2</sub> ] ( <b>2</b> ) | C <sub>2h</sub> | 13i         | 0                     | -2991.073531   | 7.2                            | 30.3                           |
| [Pd{((BiphPS)-κ <sup>2</sup> S,P) <sub>2</sub> ] tetrahedral              | C <sub>2</sub>  | none        | 2.01                  | -2991.019921   | 40.9                           | 171.1                          |
| <i>trans</i> -[Pt{((BiphPS)-κ <sup>2</sup> S,P) <sub>2</sub> }]           | C <sub>2</sub>  | none        | 0                     | -2983.495215   | 0.0                            | 0.0                            |
| <i>cis</i> -[Pt{((BiphPS)-κ <sup>2</sup> S,P) <sub>2</sub> ] ( <b>3</b> ) | C <sub>2h</sub> | 11i         | 0                     | -2983.481048   | 8.9                            | 37.2                           |
| [Pt{((BiphPS)-κ <sup>2</sup> S,P) <sub>2</sub> ] tetrahedral              | C <sub>2</sub>  | none        | 2.01                  | -2983.413477   | 51.3                           | 214.6                          |

## Cartesian coordinates of the optimized geometries:

### *cis*-[Ni{(BiphPS)- $\kappa^2$ S,P}<sub>2</sub>]

|    |             |             |             |
|----|-------------|-------------|-------------|
| Ni | 0.00000000  | 0.00000000  | 1.76892400  |
| S  | 0.13516400  | 1.52990800  | 3.38342600  |
| P  | 0.00000000  | 1.62485700  | 0.32404400  |
| S  | -0.13516400 | -1.52990800 | 3.38342600  |
| P  | 0.00000000  | -1.62485700 | 0.32404400  |
| C  | 0.41366300  | 3.06829700  | 2.56313000  |
| C  | 0.39193700  | 3.17265100  | 1.16558800  |
| C  | -1.57822400 | 1.84903300  | -0.55101800 |
| C  | 0.90383600  | 1.60872100  | -1.25167700 |
| C  | -0.41366300 | -3.06829700 | 2.56313000  |
| C  | -0.39193700 | -3.17265100 | 1.16558800  |
| C  | -0.90383600 | -1.60872100 | -1.25167700 |
| C  | 1.57822400  | -1.84903300 | -0.55101800 |
| C  | 0.65493100  | 4.23579200  | 3.30385300  |
| C  | 0.60032200  | 4.39000700  | 0.51584100  |
| C  | -2.84477500 | 1.95331200  | 0.00679600  |
| C  | -1.38370200 | 1.88422100  | -1.94233600 |
| C  | 0.02263600  | 1.74041700  | -2.33977700 |
| C  | 2.27324300  | 1.48101200  | -1.44532700 |
| C  | -0.65493100 | -4.23579200 | 3.30385300  |
| C  | -0.60032200 | -4.39000700 | 0.51584100  |
| C  | -2.27324300 | -1.48101200 | -1.44532700 |
| C  | -0.02263600 | -1.74041700 | -2.33977700 |
| C  | 1.38370200  | -1.88422100 | -1.94233600 |
| C  | 2.84477500  | -1.95331200 | 0.00679600  |
| C  | 0.86951800  | 5.44289600  | 2.65619300  |
| C  | 0.84512900  | 5.53326500  | 1.26178600  |
| C  | -3.93923600 | 2.11073800  | -0.84151400 |
| C  | -2.48576300 | 2.03484500  | -2.78060700 |
| C  | 0.53268600  | 1.71535400  | -3.63624900 |
| C  | 2.77307500  | 1.47043000  | -2.74451200 |
| C  | -0.86951800 | -5.44289600 | 2.65619300  |
| C  | -0.84512900 | -5.53326500 | 1.26178600  |
| C  | -2.77307500 | -1.47043000 | -2.74451200 |
| C  | -0.53268600 | -1.71535400 | -3.63624900 |
| C  | 2.48576300  | -2.03484500 | -2.78060700 |
| C  | 3.93923600  | -2.11073800 | -0.84151400 |
| C  | -3.75551700 | 2.15173500  | -2.22403000 |
| C  | 1.90313000  | 1.57747300  | -3.83005400 |
| C  | -1.90313000 | -1.57747300 | -3.83005400 |
| C  | 3.75551700  | -2.15173500 | -2.22403000 |
| H  | 0.67838700  | 4.17976400  | 4.39010800  |
| H  | 0.57115900  | 4.43231100  | -0.57313200 |
| H  | -2.96973500 | 1.91080700  | 1.08850800  |
| H  | 2.93994300  | 1.37287600  | -0.59063100 |
| H  | -0.67838700 | -4.17976400 | 4.39010800  |
| H  | -0.57115900 | -4.43231100 | -0.57313200 |
| H  | -2.93994300 | -1.37287600 | -0.59063100 |
| H  | 2.96973500  | -1.91080700 | 1.08850800  |
| H  | 1.06381900  | 6.33499700  | 3.24846800  |
| H  | 1.01580800  | 6.48673000  | 0.76879600  |
| H  | -4.93925100 | 2.20300500  | -0.42472400 |
| H  | -2.35794000 | 2.05485700  | -3.86197000 |
| H  | -0.13632800 | 1.79859200  | -4.49152300 |
| H  | 3.84175700  | 1.36040600  | -2.91254700 |
| H  | -1.06381900 | -6.33499700 | 3.24846800  |
| H  | -1.01580800 | -6.48673000 | 0.76879600  |
| H  | -3.84175700 | -1.36040600 | -2.91254700 |
| H  | 0.13632800  | -1.79859200 | -4.49152300 |
| H  | 2.35794000  | -2.05485700 | -3.86197000 |
| H  | 4.93925100  | -2.20300500 | -0.42472400 |
| H  | -4.61745000 | 2.27294100  | -2.87636600 |
| H  | 2.30214100  | 1.55807000  | -4.84193300 |
| H  | -2.30214100 | -1.55807000 | -4.84193300 |
| H  | 4.61745000  | -2.27294100 | -2.87636600 |

*trans*-[Ni{(BiphPS)- $\kappa^2$ S,P}<sub>2</sub>]

|    |             |             |             |
|----|-------------|-------------|-------------|
| Ni | 0.00000000  | 0.00000000  | 0.00000000  |
| S  | -2.17729500 | 0.42103000  | 0.00000000  |
| P  | -0.43833700 | -2.13798500 | 0.00000000  |
| S  | 2.17729500  | -0.42103000 | 0.00000000  |
| P  | 0.43833700  | 2.13798500  | 0.00000000  |
| C  | -2.96429500 | -1.16373300 | 0.00000000  |
| C  | -2.23226700 | -2.35879700 | 0.00000000  |
| C  | 0.28095000  | -3.18565100 | 1.29494000  |
| C  | 0.28095000  | -3.18565100 | -1.29494000 |
| C  | 2.96429500  | 1.16373300  | 0.00000000  |
| C  | 2.23226700  | 2.35879700  | 0.00000000  |
| C  | -0.28095000 | 3.18565100  | -1.29494000 |
| C  | -0.28095000 | 3.18565100  | 1.29494000  |
| C  | -4.36438100 | -1.24615500 | 0.00000000  |
| C  | -2.86802000 | -3.60228500 | 0.00000000  |
| C  | 0.17410400  | -3.02540600 | 2.66871400  |
| C  | 1.04741800  | -4.22243900 | 0.73476700  |
| C  | 1.04741800  | -4.22243900 | -0.73476700 |
| C  | 0.17410400  | -3.02540600 | -2.66871400 |
| C  | 4.36438100  | 1.24615500  | 0.00000000  |
| C  | 2.86802000  | 3.60228500  | 0.00000000  |
| C  | -0.17410400 | 3.02540600  | -2.66871400 |
| C  | -1.04741800 | 4.22243900  | -0.73476700 |
| C  | -1.04741800 | 4.22243900  | 0.73476700  |
| C  | -0.17410400 | 3.02540600  | 2.66871400  |
| C  | -4.99168000 | -2.48281900 | 0.00000000  |
| C  | -4.25318400 | -3.66895300 | 0.00000000  |
| C  | 0.82941500  | -3.92616800 | 3.50401800  |
| C  | 1.70537000  | -5.11288600 | 1.58030600  |
| C  | 1.70537000  | -5.11288600 | -1.58030600 |
| C  | 0.82941500  | -3.92616800 | -3.50401800 |
| C  | 4.99168000  | 2.48281900  | 0.00000000  |
| C  | 4.25318400  | 3.66895300  | 0.00000000  |
| C  | -0.82941500 | 3.92616800  | -3.50401800 |
| C  | -1.70537000 | 5.11288600  | -1.58030600 |
| C  | -1.70537000 | 5.11288600  | 1.58030600  |
| C  | -0.82941500 | 3.92616800  | 3.50401800  |
| C  | 1.58976200  | -4.96004100 | 2.95821800  |
| C  | 1.58976200  | -4.96004100 | -2.95821800 |
| C  | -1.58976200 | 4.96004100  | -2.95821800 |
| C  | -1.58976200 | 4.96004100  | 2.95821800  |
| H  | -4.95016100 | -0.32930800 | 0.00000000  |
| H  | -2.26640700 | -4.51152100 | 0.00000000  |
| H  | -0.41170400 | -2.20393000 | 3.07931900  |
| H  | -0.41170400 | -2.20393000 | -3.07931900 |
| H  | 4.95016100  | 0.32930800  | 0.00000000  |
| H  | 2.26640700  | 4.51152100  | 0.00000000  |
| H  | 0.41170400  | 2.20393000  | -3.07931900 |
| H  | 0.41170400  | 2.20393000  | 3.07931900  |
| H  | -6.07898800 | -2.52717700 | 0.00000000  |
| H  | -4.75751900 | -4.63175400 | 0.00000000  |
| H  | 0.75472900  | -3.81986400 | 4.58335900  |
| H  | 2.30826200  | -5.92076600 | 1.16915800  |
| H  | 2.30826200  | -5.92076600 | -1.16915800 |
| H  | 0.75472900  | -3.81986400 | -4.58335900 |
| H  | 6.07898800  | 2.52717700  | 0.00000000  |
| H  | 4.75751900  | 4.63175400  | 0.00000000  |
| H  | -0.75472900 | 3.81986400  | -4.58335900 |
| H  | -2.30826200 | 5.92076600  | -1.16915800 |
| H  | -2.30826200 | 5.92076600  | 1.16915800  |
| H  | -0.75472900 | 3.81986400  | 4.58335900  |
| H  | 2.10393300  | -5.65457400 | 3.61863400  |
| H  | 2.10393300  | -5.65457400 | -3.61863400 |
| H  | -2.10393300 | 5.65457400  | -3.61863400 |
| H  | -2.10393300 | 5.65457400  | 3.61863400  |

**[Ni{(BiphPS)- $\kappa^2S,P$ }]<sub>2</sub> tetrahedral**

|    |             |             |             |
|----|-------------|-------------|-------------|
| Ni | 0.00000000  | 0.00000000  | 1.65397400  |
| S  | 0.11888200  | 2.24142200  | 2.01555100  |
| P  | -1.70009000 | 0.43191300  | 0.22535800  |
| S  | -0.11888200 | -2.24142200 | 2.01555100  |
| P  | 1.70009000  | -0.43191300 | 0.22535800  |
| C  | -0.41124500 | 2.82476800  | 0.42635500  |
| C  | -1.24609900 | 2.06338200  | -0.41840400 |
| C  | -3.33235300 | 0.54196400  | 1.00741500  |
| C  | -2.35961100 | -0.58932900 | -1.11700700 |
| C  | 0.41124500  | -2.82476800 | 0.42635500  |
| C  | 1.24609900  | -2.06338200 | -0.41840400 |
| C  | 2.35961100  | 0.58932900  | -1.11700700 |
| C  | 3.33235300  | -0.54196400 | 1.00741500  |
| C  | 0.00000000  | 4.08656100  | -0.02450800 |
| C  | -1.65013900 | 2.54920200  | -1.66349500 |
| C  | -3.67524300 | 1.21871700  | 2.17022400  |
| C  | -4.27752400 | -0.21306400 | 0.29015300  |
| C  | -3.72649600 | -0.85817300 | -0.90761100 |
| C  | -1.67798600 | -1.14740000 | -2.19234500 |
| C  | 0.00000000  | -4.08656100 | -0.02450800 |
| C  | 1.65013900  | -2.54920200 | -1.66349500 |
| C  | 1.67798600  | 1.14740000  | -2.19234500 |
| C  | 3.72649600  | 0.85817300  | -0.90761100 |
| C  | 4.27752400  | 0.21306400  | 0.29015300  |
| C  | 3.67524300  | -1.21871700 | 2.17022400  |
| C  | -0.40008900 | 4.56120800  | -1.26564100 |
| C  | -1.22344900 | 3.79829500  | -2.09464400 |
| C  | -4.99154900 | 1.15108300  | 2.61956000  |
| C  | -5.58816000 | -0.28033400 | 0.75710300  |
| C  | -4.40451400 | -1.67998600 | -1.80577500 |
| C  | -2.36840100 | -1.96026400 | -3.08659800 |
| C  | 0.40008900  | -4.56120800 | -1.26564100 |
| C  | 1.22344900  | -3.79829500 | -2.09464400 |
| C  | 2.36840100  | 1.96026400  | -3.08659800 |
| C  | 4.40451400  | 1.67998600  | -1.80577500 |
| C  | 5.58816000  | 0.28033400  | 0.75710300  |
| C  | 4.99154900  | -1.15108300 | 2.61956000  |
| C  | -5.93682200 | 0.40401700  | 1.91694300  |
| C  | -3.72408300 | -2.22109600 | -2.89113800 |
| C  | 3.72408300  | 2.22109600  | -2.89113800 |
| C  | 5.93682200  | -0.40401700 | 1.91694300  |
| H  | 0.64984900  | 4.68410400  | 0.61120900  |
| H  | -2.29379200 | 1.93555200  | -2.29379300 |
| H  | -2.91840100 | 1.78555100  | 2.71148000  |
| H  | -0.60909600 | -0.97628200 | -2.32426700 |
| H  | -0.64984900 | -4.68410400 | 0.61120900  |
| H  | 2.29379200  | -1.93555200 | -2.29379300 |
| H  | 0.60909600  | 0.97628200  | -2.32426700 |
| H  | 2.91840100  | -1.78555100 | 2.71148000  |
| H  | -0.05833800 | 5.53978600  | -1.59696900 |
| H  | -1.53355000 | 4.17871400  | -3.06478900 |
| H  | -5.28198300 | 1.67816100  | 3.52504300  |
| H  | -6.33602700 | -0.86200100 | 0.22072900  |
| H  | -5.46031100 | -1.90055800 | -1.65855600 |
| H  | -1.84427800 | -2.40324200 | -3.92995500 |
| H  | 0.05833800  | -5.53978600 | -1.59696900 |
| H  | 1.53355000  | -4.17871400 | -3.06478900 |
| H  | 1.84427800  | 2.40324200  | -3.92995500 |
| H  | 5.46031100  | 1.90055800  | -1.65855600 |
| H  | 6.33602700  | 0.86200100  | 0.22072900  |
| H  | 5.28198300  | -1.67816100 | 3.52504300  |
| H  | -6.96018400 | 0.35302200  | 2.28159900  |
| H  | -4.25496900 | -2.86330700 | -3.59008900 |
| H  | 4.25496900  | 2.86330700  | -3.59008900 |
| H  | 6.96018400  | -0.35302200 | 2.28159900  |

***cis*-[Pd{((BiphPS)- $\kappa^2$ S,P)}\_2]**

|    |             |             |             |
|----|-------------|-------------|-------------|
| Pd | 0.00000000  | 0.00000000  | 1.74315300  |
| S  | 0.11452300  | 1.69252200  | 3.41159500  |
| P  | 0.00000000  | 1.72560500  | 0.22561400  |
| S  | -0.11452300 | -1.69252200 | 3.41159500  |
| P  | 0.00000000  | -1.72560500 | 0.22561400  |
| C  | 0.32777700  | 3.19478900  | 2.50745200  |
| C  | 0.31214100  | 3.27203700  | 1.10482600  |
| C  | -1.50864400 | 1.91305400  | -0.76602400 |
| C  | 1.01507200  | 1.65824900  | -1.27623000 |
| C  | -0.32777700 | -3.19478900 | 2.50745200  |
| C  | -0.31214100 | -3.27203700 | 1.10482600  |
| C  | -1.01507200 | -1.65824900 | -1.27623000 |
| C  | 1.50864400  | -1.91305400 | -0.76602400 |
| C  | 0.51634500  | 4.39270900  | 3.21951500  |
| C  | 0.47710700  | 4.48906800  | 0.43594200  |
| C  | -2.80832500 | 2.05514800  | -0.30102300 |
| C  | -1.22005400 | 1.87122700  | -2.14044700 |
| C  | 0.21290100  | 1.71818400  | -2.43057300 |
| C  | 2.39418000  | 1.51775300  | -1.36026700 |
| C  | -0.51634500 | -4.39270900 | 3.21951500  |
| C  | -0.47710700 | -4.48906800 | 0.43594200  |
| C  | -2.39418000 | -1.51775300 | -1.36026700 |
| C  | -0.21290100 | -1.71818400 | -2.43057300 |
| C  | 1.22005400  | -1.87122700 | -2.14044700 |
| C  | 2.80832500  | -2.05514800 | -0.30102300 |
| C  | 0.68490800  | 5.59467100  | 2.55248100  |
| C  | 0.66811800  | 5.65658600  | 1.15605900  |
| C  | -3.84306600 | 2.16817000  | -1.22654700 |
| C  | -2.26386000 | 1.97937500  | -3.05686000 |
| C  | 0.81739300  | 1.62571500  | -3.68345700 |
| C  | 2.98761200  | 1.44154200  | -2.61654400 |
| C  | -0.68490800 | -5.59467100 | 2.55248100  |
| C  | -0.66811800 | -5.65658600 | 1.15605900  |
| C  | -2.98761200 | -1.44154200 | -2.61654400 |
| C  | -0.81739300 | -1.62571500 | -3.68345700 |
| C  | 2.26386000  | -1.97937500 | -3.05686000 |
| C  | 3.84306600  | -2.16817000 | -1.22654700 |
| C  | -3.56737900 | 2.13016100  | -2.59329100 |
| C  | 2.19962300  | 1.48997500  | -3.76697600 |
| C  | -2.19962300 | -1.48997500 | -3.76697600 |
| C  | 3.56737900  | -2.13016100 | -2.59329100 |
| H  | 0.53332500  | 4.35991800  | 4.30696400  |
| H  | 0.45538700  | 4.50991800  | -0.65394400 |
| H  | -3.00601500 | 2.07691800  | 0.77041700  |
| H  | 2.99567800  | 1.46380700  | -0.45359300 |
| H  | -0.53332500 | -4.35991800 | 4.30696400  |
| H  | -0.45538700 | -4.50991800 | -0.65394400 |
| H  | -2.99567800 | -1.46380700 | -0.45359300 |
| H  | 3.00601500  | -2.07691800 | 0.77041700  |
| H  | 0.83504800  | 6.50495200  | 3.12969400  |
| H  | 0.80308800  | 6.60538100  | 0.64359400  |
| H  | -4.86769000 | 2.28818600  | -0.88318500 |
| H  | -2.06463100 | 1.94132400  | -4.12700500 |
| H  | 0.21339000  | 1.65480200  | -4.58922400 |
| H  | 4.06567300  | 1.32825500  | -2.70165800 |
| H  | -0.83504800 | -6.50495200 | 3.12969400  |
| H  | -0.80308800 | -6.60538100 | 0.64359400  |
| H  | -4.06567300 | -1.32825500 | -2.70165800 |
| H  | -0.21339000 | -1.65480200 | -4.58922400 |
| H  | 2.06463100  | -1.94132400 | -4.12700500 |
| H  | 4.86769000  | -2.28818600 | -0.88318500 |
| H  | -4.38242300 | 2.21816100  | -3.30833600 |
| H  | 2.67249500  | 1.41816300  | -4.74419700 |
| H  | -2.67249500 | -1.41816300 | -4.74419700 |
| H  | 4.38242300  | -2.21816100 | -3.30833600 |

*trans*-[Pd{((BiphPS)-κ<sup>2</sup>S,P)<sub>2</sub>}]

|    |             |             |             |
|----|-------------|-------------|-------------|
| Pd | 0.00000000  | 0.00000000  | 0.00000000  |
| S  | -2.36095800 | 0.26159000  | 0.00000000  |
| P  | -0.39683800 | -2.27893200 | 0.00000000  |
| S  | 2.36095800  | -0.26159000 | 0.00000000  |
| P  | 0.39683800  | 2.27893200  | 0.00000000  |
| C  | -2.99560000 | -1.38927100 | 0.00000000  |
| C  | -2.18802000 | -2.53750800 | 0.00000000  |
| C  | 0.34954800  | -3.30557600 | 1.29492100  |
| C  | 0.34954800  | -3.30557600 | -1.29492100 |
| C  | 2.99560000  | 1.38927100  | 0.00000000  |
| C  | 2.18802000  | 2.53750800  | 0.00000000  |
| C  | -0.34954800 | 3.30557600  | -1.29492100 |
| C  | -0.34954800 | 3.30557600  | 1.29492100  |
| C  | -4.38922000 | -1.57417500 | 0.00000000  |
| C  | -2.74510100 | -3.82053500 | 0.00000000  |
| C  | 0.22933200  | -3.15591700 | 2.66914500  |
| C  | 1.15015500  | -4.31634500 | 0.73458700  |
| C  | 1.15015500  | -4.31634500 | -0.73458700 |
| C  | 0.22933200  | -3.15591700 | -2.66914500 |
| C  | 4.38922000  | 1.57417500  | 0.00000000  |
| C  | 2.74510100  | 3.82053500  | 0.00000000  |
| C  | -0.22933200 | 3.15591700  | -2.66914500 |
| C  | -1.15015500 | 4.31634500  | -0.73458700 |
| C  | -1.15015500 | 4.31634500  | 0.73458700  |
| C  | -0.22933200 | 3.15591700  | 2.66914500  |
| C  | -4.93471000 | -2.84722600 | 0.00000000  |
| C  | -4.12035100 | -3.98310900 | 0.00000000  |
| C  | 0.90707900  | -4.04032000 | 3.50376100  |
| C  | 1.83108000  | -5.18963500 | 1.57986700  |
| C  | 1.83108000  | -5.18963500 | -1.57986700 |
| C  | 0.90707900  | -4.04032000 | -3.50376100 |
| C  | 4.93471000  | 2.84722600  | 0.00000000  |
| C  | 4.12035100  | 3.98310900  | 0.00000000  |
| C  | -0.90707900 | 4.04032000  | -3.50376100 |
| C  | -1.83108000 | 5.18963500  | -1.57986700 |
| C  | -1.83108000 | 5.18963500  | 1.57986700  |
| C  | -0.90707900 | 4.04032000  | 3.50376100  |
| C  | 1.70264400  | -5.04724000 | 2.95771800  |
| C  | 1.70264400  | -5.04724000 | -2.95771800 |
| C  | -1.70264400 | 5.04724000  | -2.95771800 |
| C  | -1.70264400 | 5.04724000  | 2.95771800  |
| H  | -5.03528200 | -0.69856200 | 0.00000000  |
| H  | -2.08589600 | -4.68912700 | 0.00000000  |
| H  | -0.38585800 | -2.35659000 | 3.08011900  |
| H  | -0.38585800 | -2.35659000 | -3.08011900 |
| H  | 5.03528200  | 0.69856200  | 0.00000000  |
| H  | 2.08589600  | 4.68912700  | 0.00000000  |
| H  | 0.38585800  | 2.35659000  | -3.08011900 |
| H  | 0.38585800  | 2.35659000  | 3.08011900  |
| H  | -6.01710400 | -2.96022800 | 0.00000000  |
| H  | -4.55869500 | -4.97754100 | 0.00000000  |
| H  | 0.82169200  | -3.94249500 | 4.58308200  |
| H  | 2.46012300  | -5.97717300 | 1.16855100  |
| H  | 2.46012300  | -5.97717300 | -1.16855100 |
| H  | 0.82169200  | -3.94249500 | -4.58308200 |
| H  | 6.01710400  | 2.96022800  | 0.00000000  |
| H  | 4.55869500  | 4.97754100  | 0.00000000  |
| H  | -0.82169200 | 3.94249500  | -4.58308200 |
| H  | -2.46012300 | 5.97717300  | -1.16855100 |
| H  | -2.46012300 | 5.97717300  | 1.16855100  |
| H  | -0.82169200 | 3.94249500  | 4.58308200  |
| H  | 2.23388900  | -5.72894800 | 3.61791100  |
| H  | 2.23388900  | -5.72894800 | -3.61791100 |
| H  | -2.23388900 | 5.72894800  | -3.61791100 |
| H  | -2.23388900 | 5.72894800  | 3.61791100  |

**[Pd{((BiphPS)- $\kappa^2$ S,P)}<sub>2</sub>] triplet**

|    |             |             |             |
|----|-------------|-------------|-------------|
| Pd | 0.00000000  | 0.00000000  | 1.64590100  |
| S  | 0.45679500  | 2.39515600  | 1.77672800  |
| P  | -1.69500200 | 0.74096500  | 0.14582900  |
| S  | -0.45679500 | -2.39515600 | 1.77672800  |
| P  | 1.69500200  | -0.74096500 | 0.14582900  |
| C  | 0.00000000  | 2.89228300  | 0.14459500  |
| C  | -0.94747000 | 2.19300200  | -0.63517500 |
| C  | -3.24544500 | 1.22589300  | 0.94552200  |
| C  | -2.57638000 | -0.23702100 | -1.09169700 |
| C  | 0.00000000  | -2.89228300 | 0.14459500  |
| C  | 0.94747000  | -2.19300200 | -0.63517500 |
| C  | 2.57638000  | 0.23702100  | -1.09169700 |
| C  | 3.24544500  | -1.22589300 | 0.94552200  |
| C  | 0.59046900  | 4.03525700  | -0.41822500 |
| C  | -1.27103400 | 2.61328900  | -1.92883700 |
| C  | -3.41597400 | 2.05383400  | 2.04798200  |
| C  | -4.33903000 | 0.59774200  | 0.32083400  |
| C  | -3.96068500 | -0.23706400 | -0.82542200 |
| C  | -2.04339600 | -0.99652400 | -2.12743700 |
| C  | -0.59046900 | -4.03525700 | -0.41822500 |
| C  | 1.27103400  | -2.61328900 | -1.92883700 |
| C  | 2.04339600  | 0.99652400  | -2.12743700 |
| C  | 3.96068500  | 0.23706400  | -0.82542200 |
| C  | 4.33903000  | -0.59774200 | 0.32083400  |
| C  | 3.41597400  | -2.05383400 | 2.04798200  |
| C  | 0.26678700  | 4.44516000  | -1.70252100 |
| C  | -0.66066400 | 3.73681900  | -2.46946000 |
| C  | -4.70453400 | 2.27169200  | 2.52749600  |
| C  | -5.62109900 | 0.81551000  | 0.82042700  |
| C  | -4.80675400 | -0.99474400 | -1.63194500 |
| C  | -2.90187400 | -1.74044600 | -2.93133700 |
| C  | -0.26678700 | -4.44516000 | -1.70252100 |
| C  | 0.66066400  | -3.73681900 | -2.46946000 |
| C  | 2.90187400  | 1.74044600  | -2.93133700 |
| C  | 4.80675400  | 0.99474400  | -1.63194500 |
| C  | 5.62109900  | -0.81551000 | 0.82042700  |
| C  | 4.70453400  | -2.27169200 | 2.52749600  |
| C  | -5.79564600 | 1.65202600  | 1.91809200  |
| C  | -4.27408000 | -1.73560500 | -2.68220100 |
| C  | 4.27408000  | 1.73560500  | -2.68220100 |
| C  | 5.79564600  | -1.65202600 | 1.91809200  |
| H  | 1.32424300  | 4.58519100  | 0.16712400  |
| H  | -2.00348300 | 2.05149600  | -2.50772800 |
| H  | -2.54913400 | 2.51485600  | 2.52060200  |
| H  | -0.96576800 | -1.03337900 | -2.29340600 |
| H  | -1.32424300 | -4.58519100 | 0.16712400  |
| H  | 2.00348300  | -2.05149600 | -2.50772800 |
| H  | 0.96576800  | 1.03337900  | -2.29340600 |
| H  | 2.54913400  | -2.51485600 | 2.52060200  |
| H  | 0.75008600  | 5.32735200  | -2.11775000 |
| H  | -0.91064900 | 4.06469400  | -3.47539400 |
| H  | -4.86014300 | 2.92100700  | 3.38541800  |
| H  | -6.48225900 | 0.33794900  | 0.35612900  |
| H  | -5.87878500 | -1.00966000 | -1.44352700 |
| H  | -2.49717000 | -2.33809200 | -3.74477200 |
| H  | -0.75008600 | -5.32735200 | -2.11775000 |
| H  | 0.91064900  | -4.06469400 | -3.47539400 |
| H  | 2.49717000  | 2.33809200  | -3.74477200 |
| H  | 5.87878500  | 1.00966000  | -1.44352700 |
| H  | 6.48225900  | -0.33794900 | 0.35612900  |
| H  | 4.86014300  | -2.92100700 | 3.38541800  |
| H  | -6.79663000 | 1.82144300  | 2.30822000  |
| H  | -4.93638800 | -2.32750300 | -3.30986200 |
| H  | 4.93638800  | 2.32750300  | -3.30986200 |
| H  | 6.79663000  | -1.82144300 | 2.30822000  |



*cis*-[Pt{((BiphPS)- $\kappa^2$ S,P)}<sub>2</sub>]

|    |             |             |             |
|----|-------------|-------------|-------------|
| Pt | 0.00000000  | 0.00000000  | 1.58961100  |
| S  | 0.13001300  | 1.68478500  | 3.27392600  |
| P  | 0.00000000  | 1.71359300  | 0.08190500  |
| S  | -0.13001300 | -1.68478500 | 3.27392600  |
| P  | 0.00000000  | -1.71359300 | 0.08190500  |
| C  | 0.35186200  | 3.18358800  | 2.36331600  |
| C  | 0.32528400  | 3.25658900  | 0.96096100  |
| C  | -1.50127800 | 1.92701000  | -0.91783700 |
| C  | 1.02105100  | 1.63312100  | -1.41588400 |
| C  | -0.35186200 | -3.18358800 | 2.36331600  |
| C  | -0.32528400 | -3.25658900 | 0.96096100  |
| C  | -1.02105100 | -1.63312100 | -1.41588400 |
| C  | 1.50127800  | -1.92701000 | -0.91783700 |
| C  | 0.55993700  | 4.37861000  | 3.07296700  |
| C  | 0.49757100  | 4.47164300  | 0.29046600  |
| C  | -2.80062400 | 2.08642100  | -0.45856000 |
| C  | -1.20554800 | 1.89216400  | -2.29040200 |
| C  | 0.22710400  | 1.71684500  | -2.57369600 |
| C  | 2.39751800  | 1.46922800  | -1.49158100 |
| C  | -0.55993700 | -4.37861000 | 3.07296700  |
| C  | -0.49757100 | -4.47164300 | 0.29046600  |
| C  | -2.39751800 | -1.46922800 | -1.49158100 |
| C  | -0.22710400 | -1.71684500 | -2.57369600 |
| C  | 1.20554800  | -1.89216400 | -2.29040200 |
| C  | 2.80062400  | -2.08642100 | -0.45856000 |
| C  | 0.73655200  | 5.57812600  | 2.40351800  |
| C  | 0.70790300  | 5.63787900  | 1.00734900  |
| C  | -3.82833700 | 2.22318500  | -1.38877000 |
| C  | -2.24199200 | 2.02314300  | -3.21195000 |
| C  | 0.83692400  | 1.62113400  | -3.82356400 |
| C  | 2.99758000  | 1.39202500  | -2.74490900 |
| C  | -0.73655200 | -5.57812600 | 2.40351800  |
| C  | -0.70790300 | -5.63787900 | 1.00734900  |
| C  | -2.99758000 | -1.39202500 | -2.74490900 |
| C  | -0.83692400 | -1.62113400 | -3.82356400 |
| C  | 2.24199200  | -2.02314300 | -3.21195000 |
| C  | 3.82833700  | -2.22318500 | -1.38877000 |
| C  | -3.54561000 | 2.19125500  | -2.75419400 |
| C  | 2.21732300  | 1.46214800  | -3.89943000 |
| C  | -2.21732300 | -1.46214800 | -3.89943000 |
| C  | 3.54561000  | -2.19125500 | -2.75419400 |
| H  | 0.58582600  | 4.34614700  | 4.16032500  |
| H  | 0.46735100  | 4.49241900  | -0.79922700 |
| H  | -3.00313200 | 2.09996200  | 0.61203300  |
| H  | 2.98899200  | 1.39040200  | -0.58005300 |
| H  | -0.58582600 | -4.34614700 | 4.16032500  |
| H  | -0.46735100 | -4.49241900 | -0.79922700 |
| H  | -2.98899200 | -1.39040200 | -0.58005300 |
| H  | 3.00313200  | -2.09996200 | 0.61203300  |
| H  | 0.90252600  | 6.48723900  | 2.97814700  |
| H  | 0.84933500  | 6.58426500  | 0.49218000  |
| H  | -4.85298700 | 2.35637100  | -1.05033300 |
| H  | -2.03741700 | 1.98786100  | -4.28115600 |
| H  | 0.23892800  | 1.66444400  | -4.73278100 |
| H  | 4.07404300  | 1.26147600  | -2.82480300 |
| H  | -0.90252600 | -6.48723900 | 2.97814700  |
| H  | -0.84933500 | -6.58426500 | 0.49218000  |
| H  | -4.07404300 | -1.26147600 | -2.82480300 |
| H  | -0.23892800 | -1.66444400 | -4.73278100 |
| H  | 2.03741700  | -1.98786100 | -4.28115600 |
| H  | 4.85298700  | -2.35637100 | -1.05033300 |
| H  | -4.35511100 | 2.29732200  | -3.47308800 |
| H  | 2.69478700  | 1.38831300  | -4.87428900 |
| H  | -2.69478700 | -1.38831300 | -4.87428900 |
| H  | 4.35511100  | -2.29732200 | -3.47308800 |

*trans*-[Pt{((BiphPS)- $\kappa^2$ S,P)}<sub>2</sub>]

|    |             |             |             |
|----|-------------|-------------|-------------|
| Pt | 0.00000000  | 0.00000000  | 0.00000000  |
| S  | -2.36719000 | 0.26416000  | 0.00000000  |
| P  | -0.38855100 | -2.27141100 | 0.00000000  |
| S  | 2.36719000  | -0.26416000 | 0.00000000  |
| P  | 0.38855100  | 2.27141100  | 0.00000000  |
| C  | -2.99277000 | -1.38986900 | 0.00000000  |
| C  | -2.17779500 | -2.53300700 | 0.00000000  |
| C  | 0.35797400  | -3.29763900 | 1.29560800  |
| C  | 0.35797400  | -3.29763900 | -1.29560800 |
| C  | 2.99277000  | 1.38986900  | 0.00000000  |
| C  | 2.17779500  | 2.53300700  | 0.00000000  |
| C  | -0.35797400 | 3.29763900  | -1.29560800 |
| C  | -0.35797400 | 3.29763900  | 1.29560800  |
| C  | -4.38508900 | -1.58137800 | 0.00000000  |
| C  | -2.72947400 | -3.81851300 | 0.00000000  |
| C  | 0.24374700  | -3.14238200 | 2.66937400  |
| C  | 1.14167200  | -4.32084800 | 0.73493900  |
| C  | 1.14167200  | -4.32084800 | -0.73493900 |
| C  | 0.24374700  | -3.14238200 | -2.66937400 |
| C  | 4.38508900  | 1.58137800  | 0.00000000  |
| C  | 2.72947400  | 3.81851300  | 0.00000000  |
| C  | -0.24374700 | 3.14238200  | -2.66937400 |
| C  | -1.14167200 | 4.32084800  | -0.73493900 |
| C  | -1.14167200 | 4.32084800  | 0.73493900  |
| C  | -0.24374700 | 3.14238200  | 2.66937400  |
| C  | -4.92429400 | -2.85684700 | 0.00000000  |
| C  | -4.10360900 | -3.98843800 | 0.00000000  |
| C  | 0.91212000  | -4.03398300 | 3.50416300  |
| C  | 1.81202200  | -5.20232900 | 1.57997100  |
| C  | 1.81202200  | -5.20232900 | -1.57997100 |
| C  | 0.91212000  | -4.03398300 | -3.50416300 |
| C  | 4.92429400  | 2.85684700  | 0.00000000  |
| C  | 4.10360900  | 3.98843800  | 0.00000000  |
| C  | -0.91212000 | 4.03398300  | -3.50416300 |
| C  | -1.81202200 | 5.20232900  | -1.57997100 |
| C  | -1.81202200 | 5.20232900  | 1.57997100  |
| C  | -0.91212000 | 4.03398300  | 3.50416300  |
| C  | 1.69019000  | -5.05427400 | 2.95797500  |
| C  | 1.69019000  | -5.05427400 | -2.95797500 |
| C  | -1.69019000 | 5.05427400  | -2.95797500 |
| C  | -1.69019000 | 5.05427400  | 2.95797500  |
| H  | -5.03529700 | -0.70872300 | 0.00000000  |
| H  | -2.06688700 | -4.68452900 | 0.00000000  |
| H  | -0.35754000 | -2.33201800 | 3.07903000  |
| H  | -0.35754000 | -2.33201800 | -3.07903000 |
| H  | 5.03529700  | 0.70872300  | 0.00000000  |
| H  | 2.06688700  | 4.68452900  | 0.00000000  |
| H  | 0.35754000  | 2.33201800  | -3.07903000 |
| H  | 0.35754000  | 2.33201800  | 3.07903000  |
| H  | -6.00606900 | -2.97543300 | 0.00000000  |
| H  | -4.53657600 | -4.98519800 | 0.00000000  |
| H  | 0.83275600  | -3.93159400 | 4.58350700  |
| H  | 2.42825700  | -5.99999400 | 1.16880100  |
| H  | 2.42825700  | -5.99999400 | -1.16880100 |
| H  | 0.83275600  | -3.93159400 | -4.58350700 |
| H  | 6.00606900  | 2.97543300  | 0.00000000  |
| H  | 4.53657600  | 4.98519800  | 0.00000000  |
| H  | -0.83275600 | 3.93159400  | -4.58350700 |
| H  | -2.42825700 | 5.99999400  | -1.16880100 |
| H  | -2.42825700 | 5.99999400  | 1.16880100  |
| H  | -0.83275600 | 3.93159400  | 4.58350700  |
| H  | 2.21333100  | -5.74222300 | 3.61819500  |
| H  | 2.21333100  | -5.74222300 | -3.61819500 |
| H  | -2.21333100 | 5.74222300  | -3.61819500 |
| H  | -2.21333100 | 5.74222300  | 3.61819500  |

**[Pt{((BiphPS)- $\kappa^2S,P$ )}<sub>2</sub> triplet**

|    |             |             |             |
|----|-------------|-------------|-------------|
| Pt | 0.00000000  | 0.00000000  | 1.50567800  |
| S  | 2.35552400  | 0.49083900  | 1.71769700  |
| P  | 0.00000000  | 1.82970800  | 0.02523200  |
| S  | -2.35552400 | -0.49083900 | 1.71769700  |
| P  | 0.00000000  | -1.82970800 | 0.02523200  |
| C  | 2.67767800  | 1.23096100  | 0.14052100  |
| C  | 1.67890300  | 1.84236700  | -0.64656000 |
| C  | -0.37154100 | 3.44454300  | 0.75037400  |
| C  | -1.22060900 | 2.07649500  | -1.28436500 |
| C  | -2.67767800 | -1.23096100 | 0.14052100  |
| C  | -1.67890300 | -1.84236700 | -0.64656000 |
| C  | 1.22060900  | -2.07649500 | -1.28436500 |
| C  | 0.37154100  | -3.44454300 | 0.75037400  |
| C  | 3.98644800  | 1.21356700  | -0.36476600 |
| C  | 1.98359900  | 2.40887600  | -1.88781900 |
| C  | 0.22226600  | 4.04197000  | 1.85503800  |
| C  | -1.42432900 | 4.06717400  | 0.05451800  |
| C  | -1.91943900 | 3.28390700  | -1.08287100 |
| C  | -1.58771900 | 1.20076900  | -2.30070500 |
| C  | -3.98644800 | -1.21356700 | -0.36476600 |
| C  | -1.98359900 | -2.40887600 | -1.88781900 |
| C  | 1.58771900  | -1.20076900 | -2.30070500 |
| C  | 1.91943900  | -3.28390700 | -1.08287100 |
| C  | 1.42432900  | -4.06717400 | 0.05451800  |
| C  | -0.22226600 | -4.04197000 | 1.85503800  |
| C  | 4.27946400  | 1.76684600  | -1.60204800 |
| C  | 3.28228400  | 2.36652800  | -2.37424900 |
| C  | -0.23366000 | 5.29148000  | 2.26470900  |
| C  | -1.87778000 | 5.31232000  | 0.48367900  |
| C  | -2.97628400 | 3.60861000  | -1.93058200 |
| C  | -2.64240600 | 1.53809200  | -3.14240100 |
| C  | -4.27946400 | -1.76684600 | -1.60204800 |
| C  | -3.28228400 | -2.36652800 | -2.37424900 |
| C  | 2.64240600  | -1.53809200 | -3.14240100 |
| C  | 2.97628400  | -3.60861000 | -1.93058200 |
| C  | 1.87778000  | -5.31232000 | 0.48367900  |
| C  | 0.23366000  | -5.29148000 | 2.26470900  |
| C  | -1.27809400 | 5.91744800  | 1.58325600  |
| C  | -3.32949100 | 2.73742300  | -2.95572900 |
| C  | 3.32949100  | -2.73742300 | -2.95572900 |
| C  | 1.27809400  | -5.91744800 | 1.58325600  |
| H  | 4.76738600  | 0.73748900  | 0.22453000  |
| H  | 1.19005000  | 2.87544000  | -2.47153600 |
| H  | 1.02615000  | 3.53289400  | 2.38526900  |
| H  | -1.07494400 | 0.24791600  | -2.42755700 |
| H  | -4.76738600 | -0.73748900 | 0.22453000  |
| H  | -1.19005000 | -2.87544000 | -2.47153600 |
| H  | 1.07494400  | -0.24791600 | -2.42755700 |
| H  | -1.02615000 | -3.53289400 | 2.38526900  |
| H  | 5.30061900  | 1.72486400  | -1.97565400 |
| H  | 3.51931500  | 2.79962200  | -3.34279500 |
| H  | 0.22207800  | 5.77904900  | 3.12297700  |
| H  | -2.69191500 | 5.81205000  | -0.03877000 |
| H  | -3.52772400 | 4.53638100  | -1.78905700 |
| H  | -2.93817800 | 0.85653200  | -3.93628200 |
| H  | -5.30061900 | -1.72486400 | -1.97565400 |
| H  | -3.51931500 | -2.79962200 | -3.34279500 |
| H  | 2.93817800  | -0.85653200 | -3.93628200 |
| H  | 3.52772400  | -4.53638100 | -1.78905700 |
| H  | 2.69191500  | -5.81205000 | -0.03877000 |
| H  | -0.22207800 | -5.77904900 | 3.12297700  |
| H  | -1.63038900 | 6.89049800  | 1.91773300  |
| H  | -4.15885700 | 2.99103800  | -3.61191900 |
| H  | 4.15885700  | -2.99103800 | -3.61191900 |
| H  | 1.63038900  | -6.89049800 | 1.91773300  |
